# Supplementary material
Source: PubMed Central journal article supplement (PMC8314617)
Supplement: jcsm.9192.ds001.pdf [file jcsm.9192.ds001.pdf]

**Table S1: Descriptive information for our sample versus the MESA and SHHS cohorts**

|                                   | MESA           |                  | SHHS           |                  |
|-----------------------------------|----------------|------------------|----------------|------------------|
|                                   | Sample (n=296) | Cohort (n=2,068) | Sample (n=296) | Cohort (n=4,080) |
| Age (years)                       | 69.4±8.8       | 69.6±9.2         | 67.5±10.0      | 68.3±10.5        |
| Gender (number; %)                |                |                  |                |                  |
| • Female                          | 154; 52.0%     | 1,105; 53.4%     | 154; 52.0%     | 2,219; 54.4%     |
| • Male                            | 142; 48.0%     | 963; 46.6%       | 142; 48.0%     | 1,861; 45.6%     |
| Race/Ethnicity (number)           |                |                  |                |                  |
| • White/Caucasian                 | 117; 39.5%     | 785; 38.0%       | 265; 89.5%     | 3587; 87.9%      |
| • Chinese-American                | 31; 10.5%      | 236; 11.4%       | -              | -                |
| • African American                | 76; 25.7%      | 567; 27.4%       | 15; 5.1%       | 256; 6.3%        |
| • Hispanic                        | 72; 24.3%      | 480; 23.2%       | -              | -                |
| • Other                           | -              | -                | 16; 5.4%       | 237; 5.8%        |
| AHI (events/hour)                 | 20.5±19.3      | 20.4±19.1        | 20.0±18.9      | 16.5±16.0        |
| SDB severity per AHI (number; %)* |                |                  |                |                  |
| • None                            | 74; 25.0%      | 380; 20.0%       | 74; 25.0%      | 629; 23.7%       |
| • Mild                            | 74; 25.0%      | 599; 31.5%       | 74; 25.0%      | 960; 36.2%       |
| • Moderate                        | 74; 25.0%      | 472; 24.8%       | 74; 25.0%      | 637; 24.0%       |
| • Severe                          | 74; 25.0%      | 450; 23.7%       | 74; 25.0%      | 425; 16.0%       |
| Epworth Sleepiness Scale (/24)    | 6.2±4.2        | 6.0±4.1          | 7.7±4.0        | 7.3±4.2          |
| Stage 1 sleep during PSG (%)      | 14.9±10.0      | 14.4±9.1         | 5.7±3.7        | 5.8±4.0          |
| Stage 2 sleep during PSG (%)      | 55.6±10.4      | 57.6±10.2        | 58.6±11.4      | 57.7±11.1        |
| Stage 3/4 sleep during PSG (%)    | 11.1±8.8       | 10.1±9.0         | 15.6±11.1      | 15.9±11.0        |
| REM sleep during PSG (%)          | 18.4±7.3       | 18.0±6.7         | 20.2±6.2       | 20.7±6.5         |

Data are provided as mean ± standard deviation unless otherwise indicated.

The sample sizes reflect the number of participants contributing to our sample, as well as the entire MESA and SHHS (Visit 2) cohort datasets available to us (note that for MESA, a subset of 2,068 from the total sample cohort size of 2,237 is available for use by commercial entities). Not all variables are complete for the entire sample; note that an AHI is available for 1,901 and 2,651 of the MESA commercial and SHHS cohorts, respectively. Race and ethnicity are reported as a composite variable, reflecting the data available from the original studies.

\* Note that the AHI values in this table reflect the data downloaded from NSRR, whereas the AHI values in Table 1 was generated in Sleepware (see footnote, Table 1).

**Table S2: Confusion matrix for epoch-by-epoch sleep staging in MESA – No OSA**

|                     |                                                                                       | PSG sleep staging                                       |       |             |            |
|---------------------|---------------------------------------------------------------------------------------|---------------------------------------------------------|-------|-------------|------------|
|                     |                                                                                       | Wake                                                    | REM   | Light Sleep | Deep Sleep |
|                     |                                                                                       | <i>CReSS applied to heart rate and airflow signals:</i> |       |             |            |
| CReSS sleep staging | Wake                                                                                  | 10587                                                   | 185   | 1900        | 45         |
|                     | REM                                                                                   | 525                                                     | 7612  | 1282        | 10         |
|                     | Light sleep                                                                           | 3040                                                    | 1483  | 27370       | 3279       |
|                     | Deep Sleep                                                                            | 48                                                      | 18    | 2339        | 3659       |
|                     | <i>CReSS applied to heart rate, airflow, and thoracic respiratory effort signals:</i> |                                                         |       |             |            |
|                     |                                                                                       | Wake                                                    | REM   | Light Sleep | Deep Sleep |
|                     | Wake                                                                                  | 11528                                                   | 202   | 2028        | 34         |
|                     | REM                                                                                   | 342                                                     | 7837  | 1018        | 11         |
| Light sleep         | 2310                                                                                  | 1248                                                    | 27795 | 3351        |            |
| Deep Sleep          | 20                                                                                    | 11                                                      | 2050  | 3597        |            |

Gray cells indicate the number of epochs of each PSG-scored sleep stage that were correctly identified by CReSS.

**Table S3: Confusion matrix for epoch-by-epoch sleep staging in MESA – Mild OSA**

|                     |                                                                                       | PSG sleep staging                                       |       |             |            |
|---------------------|---------------------------------------------------------------------------------------|---------------------------------------------------------|-------|-------------|------------|
|                     |                                                                                       | Wake                                                    | REM   | Light Sleep | Deep Sleep |
|                     |                                                                                       | <i>CReSS applied to heart rate and airflow signals:</i> |       |             |            |
| CReSS sleep staging | Wake                                                                                  | 13173                                                   | 213   | 1822        | 38         |
|                     | REM                                                                                   | 747                                                     | 9156  | 1448        | 21         |
|                     | Light sleep                                                                           | 3998                                                    | 1845  | 31989       | 2508       |
|                     | Deep Sleep                                                                            | 40                                                      | 28    | 3535        | 3374       |
|                     | <i>CReSS applied to heart rate, airflow, and thoracic respiratory effort signals:</i> |                                                         |       |             |            |
|                     |                                                                                       | Wake                                                    | REM   | Light Sleep | Deep Sleep |
|                     | Wake                                                                                  | 13929                                                   | 145   | 1901        | 33         |
|                     | REM                                                                                   | 630                                                     | 9763  | 1345        | 25         |
| Light sleep         | 3387                                                                                  | 1299                                                    | 32166 | 2754        |            |
| Deep Sleep          | 12                                                                                    | 35                                                      | 3382  | 3129        |            |

Gray cells indicate the number of epochs of each PSG-scored sleep stage that were correctly identified by CReSS.

**Table S4: Confusion matrix for epoch-by-epoch sleep staging in MESA – Moderate OSA**

|                     |                                                                                       | PSG sleep staging                                       |       |             |            |
|---------------------|---------------------------------------------------------------------------------------|---------------------------------------------------------|-------|-------------|------------|
|                     |                                                                                       | Wake                                                    | REM   | Light Sleep | Deep Sleep |
|                     |                                                                                       | <i>CReSS applied to heart rate and airflow signals:</i> |       |             |            |
| CReSS sleep staging | Wake                                                                                  | 15895                                                   | 335   | 1990        | 49         |
|                     | REM                                                                                   | 914                                                     | 7406  | 1511        | 31         |
|                     | Light sleep                                                                           | 4651                                                    | 1655  | 29988       | 2715       |
|                     | Deep Sleep                                                                            | 126                                                     | 21    | 2090        | 2971       |
|                     | <i>CReSS applied to heart rate, airflow, and thoracic respiratory effort signals:</i> |                                                         |       |             |            |
|                     |                                                                                       | Wake                                                    | REM   | Light Sleep | Deep Sleep |
|                     | Wake                                                                                  | 16849                                                   | 160   | 1785        | 20         |
|                     | REM                                                                                   | 841                                                     | 8054  | 1575        | 25         |
| Light sleep         | 3810                                                                                  | 1198                                                    | 30428 | 2924        |            |
| Deep Sleep          | 86                                                                                    | 5                                                       | 1791  | 2797        |            |

Gray cells indicate the number of epochs of each PSG-scored sleep stage that were correctly identified by CReSS.

**Table S5: Confusion matrix for epoch-by-epoch sleep staging in MESA – Severe OSA**

|                     |                                                                                       | PSG sleep staging                                       |       |             |            |
|---------------------|---------------------------------------------------------------------------------------|---------------------------------------------------------|-------|-------------|------------|
|                     |                                                                                       | Wake                                                    | REM   | Light Sleep | Deep Sleep |
|                     |                                                                                       | <i>CReSS applied to heart rate and airflow signals:</i> |       |             |            |
| CReSS sleep staging | Wake                                                                                  | 15869                                                   | 210   | 1671        | 71         |
|                     | REM                                                                                   | 966                                                     | 8101  | 1874        | 6          |
|                     | Light sleep                                                                           | 7578                                                    | 2021  | 36870       | 2769       |
|                     | Deep Sleep                                                                            | 66                                                      | 21    | 1838        | 2651       |
|                     | <i>CReSS applied to heart rate, airflow, and thoracic respiratory effort signals:</i> |                                                         |       |             |            |
|                     |                                                                                       | Wake                                                    | REM   | Light Sleep | Deep Sleep |
|                     | Wake                                                                                  | 17181                                                   | 91    | 1585        | 44         |
|                     | REM                                                                                   | 939                                                     | 8736  | 2071        | 8          |
| Light sleep         | 6330                                                                                  | 1520                                                    | 36999 | 2958        |            |
| Deep Sleep          | 29                                                                                    | 6                                                       | 1598  | 2487        |            |

Gray cells indicate the number of epochs of each PSG-scored sleep stage that were correctly identified by CReSS.

**Table S6: Confusion matrix for epoch-by-epoch sleep staging in SHHS – No OSA**

|                     |                                                                                       | PSG sleep staging                                       |       |             |            |
|---------------------|---------------------------------------------------------------------------------------|---------------------------------------------------------|-------|-------------|------------|
|                     |                                                                                       | Wake                                                    | REM   | Light Sleep | Deep Sleep |
|                     |                                                                                       | <i>CReSS applied to heart rate and airflow signals:</i> |       |             |            |
| CReSS sleep staging | Wake                                                                                  | 10822                                                   | 227   | 1654        | 84         |
|                     | REM                                                                                   | 665                                                     | 10236 | 1043        | 116        |
|                     | Light sleep                                                                           | 4892                                                    | 2934  | 30988       | 5627       |
|                     | Deep Sleep                                                                            | 68                                                      | 26    | 2269        | 5637       |
|                     | <i>CReSS applied to heart rate, airflow, and thoracic respiratory effort signals:</i> |                                                         |       |             |            |
|                     |                                                                                       | Wake                                                    | REM   | Light Sleep | Deep Sleep |
|                     | Wake                                                                                  | 11840                                                   | 166   | 1427        | 56         |
|                     | REM                                                                                   | 437                                                     | 11194 | 930         | 100        |
| Light sleep         | 4150                                                                                  | 2056                                                    | 31455 | 5522        |            |
| Deep Sleep          | 20                                                                                    | 7                                                       | 2142  | 5786        |            |

Gray cells indicate the number of epochs of each PSG-scored sleep stage that were correctly identified by CReSS.

**Table S7: Confusion matrix for epoch-by-epoch sleep staging in SHHS – Mild OSA**

|                     |                                                                                       | PSG sleep staging                                       |       |             |            |
|---------------------|---------------------------------------------------------------------------------------|---------------------------------------------------------|-------|-------------|------------|
|                     |                                                                                       | Wake                                                    | REM   | Light Sleep | Deep Sleep |
|                     |                                                                                       | <i>CReSS applied to heart rate and airflow signals:</i> |       |             |            |
| CReSS sleep staging | Wake                                                                                  | 12225                                                   | 317   | 1952        | 141        |
|                     | REM                                                                                   | 1146                                                    | 12301 | 1688        | 17         |
|                     | Light sleep                                                                           | 6052                                                    | 3589  | 39298       | 6190       |
|                     | Deep Sleep                                                                            | 110                                                     | 28    | 3133        | 6041       |
|                     | <i>CReSS applied to heart rate, airflow, and thoracic respiratory effort signals:</i> |                                                         |       |             |            |
|                     |                                                                                       | Wake                                                    | REM   | Light Sleep | Deep Sleep |
|                     | Wake                                                                                  | 13325                                                   | 154   | 1691        | 82         |
|                     | REM                                                                                   | 885                                                     | 13373 | 1775        | 28         |
| Light sleep         | 5281                                                                                  | 2692                                                    | 39605 | 6053        |            |
| Deep Sleep          | 42                                                                                    | 16                                                      | 3000  | 6226        |            |

Gray cells indicate the number of epochs of each PSG-scored sleep stage that were correctly identified by CReSS.

**Table S8: Confusion matrix for epoch-by-epoch sleep staging in SHHS – Moderate OSA**

|                     |                                                                                       | PSG sleep staging                                       |       |             |            |
|---------------------|---------------------------------------------------------------------------------------|---------------------------------------------------------|-------|-------------|------------|
|                     |                                                                                       | Wake                                                    | REM   | Light Sleep | Deep Sleep |
|                     |                                                                                       | <i>CReSS applied to heart rate and airflow signals:</i> |       |             |            |
| CReSS sleep staging | Wake                                                                                  | 8116                                                    | 221   | 1472        | 69         |
|                     | REM                                                                                   | 1045                                                    | 6258  | 1177        | 59         |
|                     | Light sleep                                                                           | 3805                                                    | 2428  | 24772       | 4255       |
|                     | Deep Sleep                                                                            | 187                                                     | 60    | 2007        | 2866       |
|                     | <i>CReSS applied to heart rate, airflow, and thoracic respiratory effort signals:</i> |                                                         |       |             |            |
|                     |                                                                                       | Wake                                                    | REM   | Light Sleep | Deep Sleep |
|                     | Wake                                                                                  | 9106                                                    | 72    | 1151        | 32         |
|                     | REM                                                                                   | 763                                                     | 7015  | 1207        | 56         |
| Light sleep         | 3194                                                                                  | 1844                                                    | 25183 | 4141        |            |
| Deep Sleep          | 90                                                                                    | 36                                                      | 1887  | 3020        |            |

Gray cells indicate the number of epochs of each PSG-scored sleep stage that were correctly identified by CReSS.

**Table S9: Confusion matrix for epoch-by-epoch sleep staging in SHHS – Severe OSA**

|                     |                                                                                       | PSG sleep staging                                       |       |             |            |
|---------------------|---------------------------------------------------------------------------------------|---------------------------------------------------------|-------|-------------|------------|
|                     |                                                                                       | Wake                                                    | REM   | Light Sleep | Deep Sleep |
|                     |                                                                                       | <i>CReSS applied to heart rate and airflow signals:</i> |       |             |            |
| CReSS sleep staging | Wake                                                                                  | 8791                                                    | 177   | 1690        | 30         |
|                     | REM                                                                                   | 1153                                                    | 4531  | 1026        | 59         |
|                     | Light sleep                                                                           | 6170                                                    | 2050  | 26190       | 2028       |
|                     | Deep Sleep                                                                            | 146                                                     | 47    | 1374        | 1344       |
|                     | <i>CReSS applied to heart rate, airflow, and thoracic respiratory effort signals:</i> |                                                         |       |             |            |
|                     |                                                                                       | Wake                                                    | REM   | Light Sleep | Deep Sleep |
|                     | Wake                                                                                  | 9999                                                    | 170   | 1297        | 27         |
|                     | REM                                                                                   | 832                                                     | 5002  | 976         | 24         |
| Light sleep         | 5376                                                                                  | 1600                                                    | 26925 | 2143        |            |
| Deep Sleep          | 53                                                                                    | 33                                                      | 1082  | 1267        |            |

Gray cells indicate the number of epochs of each PSG-scored sleep stage that were correctly identified by CReSS.
